# Supplementary material for: HF-Free synthesis of colloidal Cs2ZrF6 and (NH4)2ZrF6 nanocrystals
Source: Royal Society of Chemistry journal article supplement (doi:10.1039/d3cc00374d), 2023-01-01
Supplement: d3cc00374d1.pdf [file d3cc00374d1.pdf]

## Supplemental Information

### HF-free synthesis of colloidal $\text{Cs}_2\text{ZrF}_6$ and $(\text{NH}_4)_2\text{ZrF}_6$ nanocrystals

Eden Tzanetopoulos, Julie Schwartz, and Daniel R. Gamelin\*

*Department of Chemistry, University of Washington  
Seattle, Washington 98195-1700, United States*

e-mail: [gamelin@uw.edu](mailto:gamelin@uw.edu)

## EXPERIMENTAL METHODS

Zirconium(IV) acetylacetonate ( $\text{Zr}(\text{C}_5\text{O}_2\text{H}_7)_4$ , 97%), zirconium(IV) carbonate basic ( $\text{Zr}(\text{OH})_2\text{CO}_3 \cdot \text{ZrO}_2$ ,  $\geq 40\%$   $\text{ZrO}_2$  basis), trifluoroacetic acid (TFA, 99%), cesium(I) hydroxide hydrate ( $\text{CsOH} \cdot \text{H}_2\text{O}$ ,  $\geq 90\%$ ), cesium(I) carbonate ( $\text{Cs}_2\text{CO}_3$ , 99%), oleic acid (OA, 90%), oleylamine (OAm, 70%), trioctylphosphine (TOP, 97%), and 1-octadecene (ODE, 90%) were purchased from Sigma-Aldrich. Ammonium fluoride hydrate ( $\text{NH}_4\text{F} \cdot x\text{H}_2\text{O}$ ,  $x \approx 0.5$ , 99.9975%) was purchased from Alfa Aesar. All reagents were used without further purification.

***Serious care and attention are needed when working with any fluoride material.***  $\text{NH}_4\text{F}$  is a hydrophilic crystalline solid and should be stored in a cool dry area and always remain in a sealed plastic container when not in use. Long neoprene gloves and a neoprene apron were worn during all handling of  $\text{NH}_4\text{F}$ , in addition to typical personal protective equipment. A face mask or shield is also recommended when working with fluorides. Always have calcium gluconate paste nearby in case of accidental skin exposure to  $\text{NH}_4\text{F}$ .

All reaction liquids with any amount of assumed free fluoride anions should not remain in glass containers (flasks, beakers, etc.) for more than a few hours to avoid etching and possible cracking. A fluoride waste stream separate from incompatible compounds should be prepared, well-labeled, and handled with care.

**Synthesis Attempt of  $\text{Cs}_2\text{ZrF}_6$  with Trifluoroacetic Acid.** Synthesis was attempted following literature procedure for  $\text{NaYF}_4$  nanocrystals.<sup>1</sup> 410 mg (2.5 mmol Cs) of  $\text{Cs}_2\text{CO}_3$ , 390 mg  $\text{Zr}(\text{OH})_2\text{CO}_3 \cdot \text{ZrO}_2$  (2.5 mmol Zr), and 10.0 mL of TFA were added to a 100-mL 3-neck round bottom flask. The solution was put under  $\text{N}_2$  flow and the temperature was raised to  $80^\circ\text{C}$ . The solution was kept at temperature for 40 min, at which the solution was clear yellow. The solution was brought to room temperature before placing the flask under vacuum to pull off excess TFA. A faint orange solid was observed. 10.0 mL OA and 5.0 mL ODE were added, and the solution was degassed at  $120^\circ\text{C}$  for 1 h. A separate 100-mL flask of 10.0 mL OA and 15.0 mL ODE was degassed at  $120^\circ\text{C}$  for the same time. The TFA-precursor solution was kept at  $120^\circ\text{C}$  and turned to  $\text{N}_2$  flow while the second solution was heated to  $310^\circ\text{C}$  under  $\text{N}_2$  flow. A cannula transfer of the TFA-precursor solution to the receiving solvent and ligand solution occurred over a 15 min span, with periodic vapor bursts observed in the receiving flask. The reaction solution was stirred under  $\text{N}_2$  at  $305^\circ\text{C}$  for 1 h before cooling to room temperature. The solid was precipitated from solution with ethanol and centrifuged at 10,000 rpm for 10 min before collecting the solid and washing again with ethanol.

**Synthesis of  $\text{Cs}_2\text{ZrF}_6$  Microcrystals.** 490 mg (1.0 mmol) of  $\text{Zr}(\text{C}_5\text{O}_2\text{H}_7)_4$  was added to 10.0 mL OA and 15.0 mL ODE in a 100-mL 3-neck round bottom flask and heated to  $160^\circ\text{C}$  under  $\text{N}_2$  flow for 30 min with constant stirring. The clear light-yellow solution was cooled to room temperature. 280 mg (6.1 mmol) of

$\text{NH}_4\text{F} \cdot x\text{H}_2\text{O}$  and 340 mg (2.0 mmol) of  $\text{CsOH} \cdot \text{H}_2\text{O}$  were added at a  $\text{N}_2$  overpressure then 6.0 mL of methanol was injected through a septum cap into the reaction mixture, and the solution was stirred as the methanol was pulled off under vacuum. The solution was then slowly heated to  $60^\circ\text{C}$  and let sit for 1 h to ensure the removal of all methanol. The solution was heated to  $250^\circ\text{C}$  under  $\text{N}_2$  flow and the reaction was quenched in a water bath after 10 min at temperature.

**Synthesis of Cs-oleate.** 200 mg (1.2 mmol Cs) of  $\text{Cs}_2\text{CO}_3$  was added to 0.7 mL of OA and 7.5 mL of ODE in a 100-mL 3-neck round bottom flask. The solution was degassed at  $120^\circ\text{C}$  under vacuum for 1 h. The clear solution was then heated to  $150^\circ\text{C}$  under  $\text{N}_2$  flow for 40 min before letting cool to room temperature.

**Synthesis of Hollow  $\text{Cs}_2\text{ZrF}_6$  Nanocrystals.** 150 mg (0.31 mmol) of  $\text{Zr}(\text{C}_5\text{O}_2\text{H}_7)_4$  was added to 3.4 mL OA and 5.0 mL ODE in a 50-mL 3-neck round bottom flask and heated to  $160^\circ\text{C}$  under  $\text{N}_2$  flow for 30 min with constant stirring. The clear light-yellow solution was cooled to room temperature. 85 mg (1.8 mmol) of  $\text{NH}_4\text{F} \cdot x\text{H}_2\text{O}$  was added at a  $\text{N}_2$  overpressure then 2.0 mL of methanol was injected through a septum cap into the reaction mixture. The solution was stirred as the methanol was pulled off under vacuum at room temperature. The solution was then slowly heated to  $85^\circ\text{C}$  and let sit for 40 min then raised to  $110^\circ\text{C}$  and left for another 40 min under vacuum to ensure the removal of all methanol. The solution was heated to  $250^\circ\text{C}$  under  $\text{N}_2$  flow at which 8.2 mL of Cs-oleate, gently heated until clear at  $100^\circ\text{C}$  in the glovebox, was swiftly injected into the reaction solution. The reaction was quenched in a room temperature water bath after 10 min (timer began upon reaction solution returning to  $250^\circ\text{C}$ ).

**Synthesis of Hollow  $\text{Cs}_2\text{ZrF}_6$  Nanocrystals with Multiple Ligand Types.** 150 mg (0.31 mmol) of  $\text{Zr}(\text{C}_5\text{O}_2\text{H}_7)_4$  was added to 2.2 mL OA, 0.2 mL OAm, and 5.0 mL ODE in a 50-mL 3-neck round bottom flask and degassed at  $100^\circ\text{C}$  for 10 min. The solution was put under  $\text{N}_2$  flow and 0.5 mL TOP from a glovebox was added, then returned to vacuum for another 10 min. The solution was then heated to  $160^\circ\text{C}$  under  $\text{N}_2$  flow for 30 min with constant stirring. The clear light-yellow solution was cooled to room temperature. 85 mg (1.8 mmol) of  $\text{NH}_4\text{F} \cdot x\text{H}_2\text{O}$  was added at an overpressure then 2.0 mL of methanol was injected through a septum cap into the reaction mixture. The solution was stirred as the methanol was pulled off under vacuum at room temperature. The solution was slowly heated to  $85^\circ\text{C}$  and let sit for 40 min then raised to  $110^\circ\text{C}$  and left for another 40 min under vacuum to ensure the removal of all methanol. The solution was heated to  $250^\circ\text{C}$  under  $\text{N}_2$  flow at which 8.2 mL of Cs-oleate, gently heated until clear at  $100^\circ\text{C}$  in the glovebox, was swiftly injected into the reaction solution. The reaction was quenched in a room temperature water bath after 3 min (timer began upon reaction solution returning to  $250^\circ\text{C}$ ).

**Synthesis of  $\text{Cs}_2\text{ZrF}_6$  Nanocrystals.** 150 mg (0.31 mmol) of  $\text{Zr}(\text{C}_5\text{O}_2\text{H}_7)_4$  was added to 2.5 mL OA and 5.0 mL ODE in a 50-mL 3-neck round bottom flask and heated to  $160^\circ\text{C}$  under  $\text{N}_2$  flow for 30 min with constant stirring. The clear light-yellow solution was cooled to room temperature. 85 mg (1.8 mmol) of  $\text{NH}_4\text{F} \cdot x\text{H}_2\text{O}$  was added at an overpressure then 2.0 mL of methanol was injected, and the solution was stirred as the methanol was pulled off under vacuum. The solution was slowly heated to  $85^\circ\text{C}$  and let sit for 40 min then raised to  $110^\circ\text{C}$  and left for another 40 min under vacuum to ensure the removal of all methanol. The solution was heated to  $180^\circ\text{C}$  under  $\text{N}_2$  flow at which 8.2 mL of Cs-oleate, gently heated until clear at  $100^\circ\text{C}$  in the glovebox, was swiftly injected into the reaction solution. The reaction was quenched in a room temperature water bath after 1 min (timer began upon reaction solution returning to  $180^\circ\text{C}$ ).

**Washing of  $\text{Cs}_2\text{ZrF}_6$  Nanocrystals.** The mother-liquor reaction solution was collected into microcentrifuge tubes and spun at 6,800 rpm for 10 min. The white precipitate was then collected and resuspended in anhydrous hexane solution. To prepare samples for XRD, the product solid was washed with ethanol and spun at 12,000 rpm for 10 min in a  $\text{N}_2$ -atmosphere glovebox, then resuspended in hexane

before being dropcast onto a Si wafer. To separate the  $\text{Cs}_2\text{ZrF}_6$  nanocrystals from the larger CsF salt impurity, the product solution was spun at 9,000 rpm for 3 min in a  $\text{N}_2$ -atmosphere glovebox and the supernatant of  $\text{Cs}_2\text{ZrF}_6$  nanocrystals was collected.

**Synthesis of  $(\text{NH}_4)_2\text{ZrF}_6$  Nanocrystals.** 150 mg (0.31 mmol) of  $\text{Zr}(\text{C}_5\text{O}_2\text{H}_7)_4$  was added to 2.5 mL OA and 5.0 mL ODE in a 50-mL 3-neck round bottom flask and heated to  $160^\circ\text{C}$  under  $\text{N}_2$  flow for 30 min with constant stirring. The clear light-yellow solution was cooled to room temperature. 85 mg (1.8 mmol) of  $\text{NH}_4\text{F} \cdot x\text{H}_2\text{O}$  was added at an overpressure then 2.0 mL of methanol was injected, and the solution was stirred as the methanol was pulled off under vacuum. The solution was slowly heated to  $85^\circ\text{C}$  and let sit for 40 min then raised to  $110^\circ\text{C}$  and left for another 40 min under vacuum to ensure the removal of all methanol. The solution was heated to  $180^\circ\text{C}$  under  $\text{N}_2$  flow. The reaction was quenched in a room temperature water bath 30 sec after reaching temperature.

**Washing of  $(\text{NH}_4)_2\text{ZrF}_6$  Nanocrystals.** The mother-liquor reaction solution was collected into microcentrifuge tubes and spun at 12,000 rpm for 10 min. The white precipitate was then collected and resuspended in anhydrous hexane solution. The resuspended product solution was spun at 2,000 rpm for 1 min and the supernatant was collected. To prepare samples for XRD, the product solid was washed with ethanol and spun at 12,000 rpm for 10 min in a  $\text{N}_2$ -atmosphere glovebox, then resuspended in hexane before being dropcast onto a Si wafer.

## POWDER X-RAY DIFFRACTION AND TRANSMISSION ELECTRON MICROSCOPY

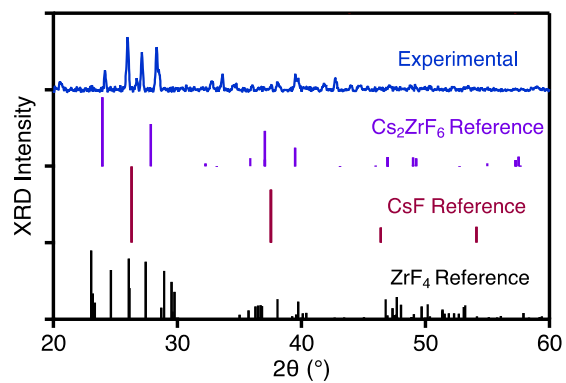

**Fig. S1.** Powder X-ray diffraction (pXRD) data of attempted synthesis of Cs<sub>2</sub>ZrF<sub>6</sub> using trifluoroacetic acid (TFA) as fluoride source. For comparison Cs<sub>2</sub>ZrF<sub>6</sub> (trigonal, ICSD Coll. Code 25598), CsF (cubic, ICSD Coll. Code 61563), and ZrF<sub>4</sub> (tetragonal, ICSD Coll. Code 35100) references are given. No references match the crystalline sample data.

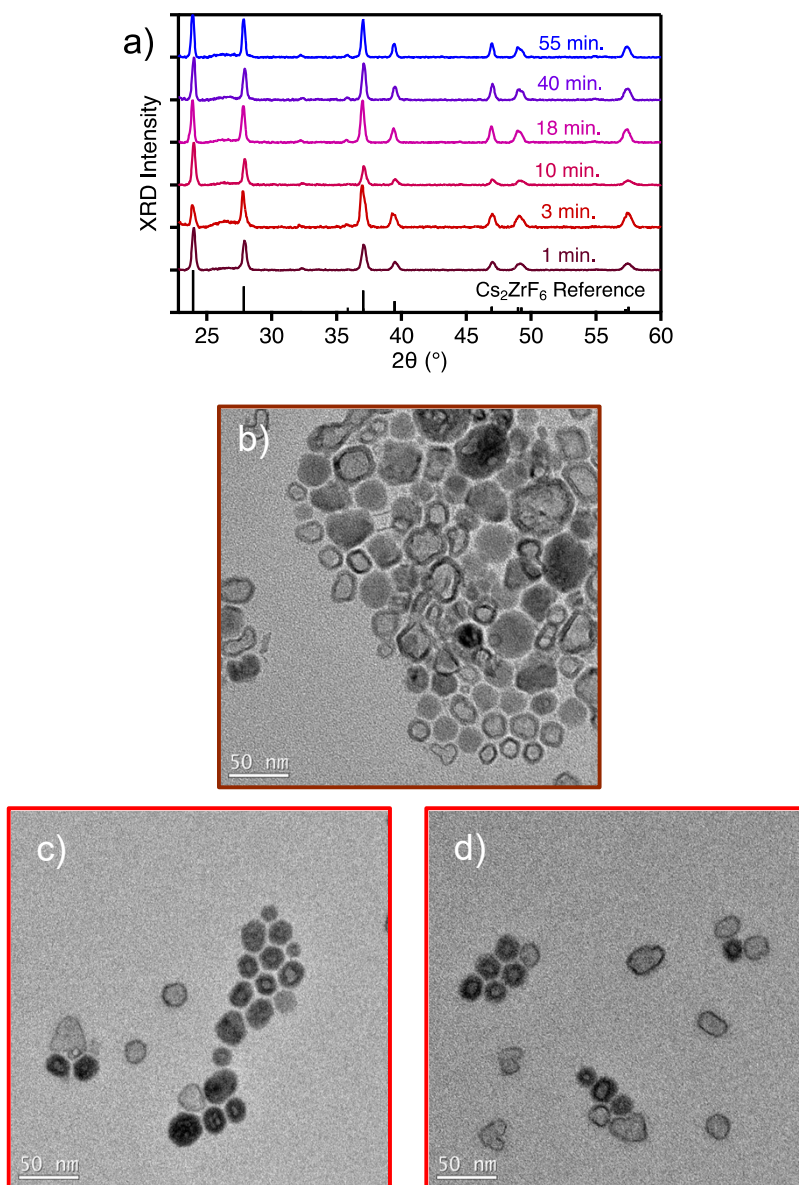

**Fig. S2.** (a) pXRD data of hollow  $\text{Cs}_2\text{ZrF}_6$  nanocrystals ( $T_{\text{rxn}} = 250\text{ }^\circ\text{C}$ ) with reaction times indicated on spectra. pXRD data are compared to  $\text{Cs}_2\text{ZrF}_6$  (trigonal, ICSD Coll. Code 25598) reference. (b) Transmission electron microscope (TEM) image of hollow  $\text{Cs}_2\text{ZrF}_6$  nanocrystals after 1-min reaction time. (c), (d) TEM images of hollow  $\text{Cs}_2\text{ZrF}_6$  nanocrystals after 3-min reaction time.

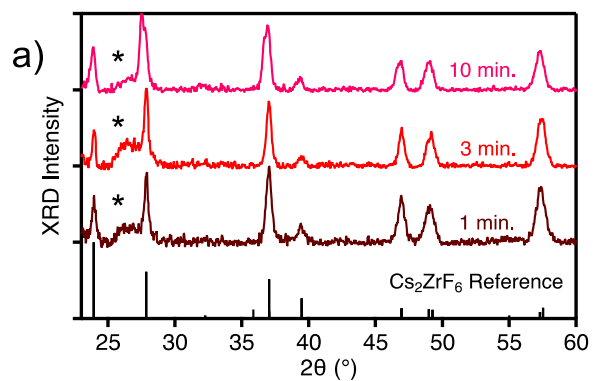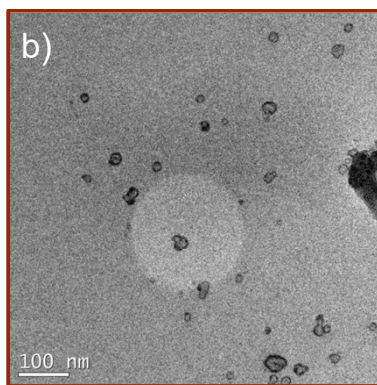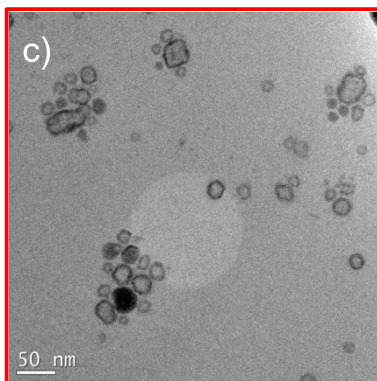

**Fig. S3.** (a) pXRD data of hollow  $\text{Cs}_2\text{ZrF}_6$  nanocrystals ( $T_{\text{rxn}} = 250^\circ\text{C}$ ) with TOP and OAm ligands included. pXRD data are compared to  $\text{Cs}_2\text{ZrF}_6$  (trigonal, ICSD Coll. Code 25598) reference. Asterisk (\*) indicates diffuse Kapton tape peak. Kapton tape is used to cover the sample to avoid water adsorption in air. (b) TEM image of hollow  $\text{Cs}_2\text{ZrF}_6$  nanocrystals after 1-min reaction time. (c) TEM image of hollow  $\text{Cs}_2\text{ZrF}_6$  nanocrystals after 3-min reaction time.

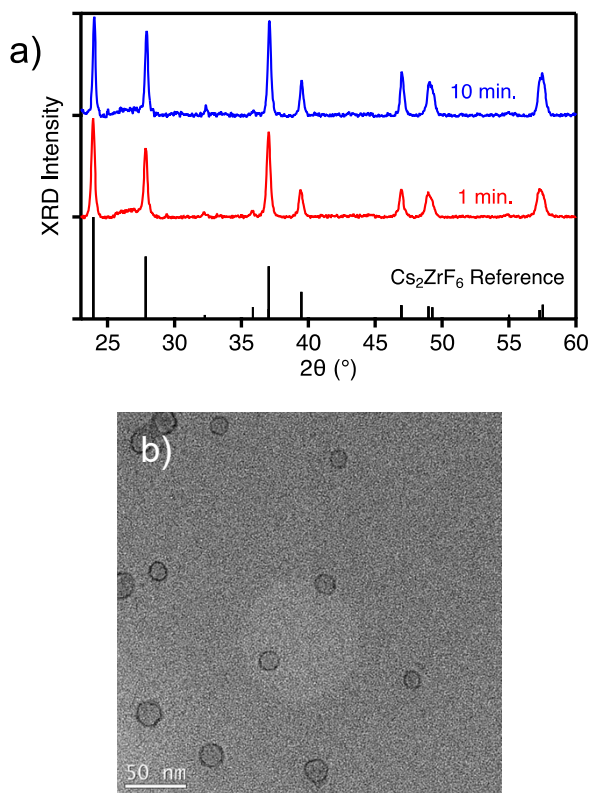

**Fig. S4.** (a) pXRD data of hollow  $\text{Cs}_2\text{ZrF}_6$  nanocrystals ( $T_{\text{rxn}} = 220\text{ }^\circ\text{C}$ ) with reaction times indicated on the data. pXRD data are compared to  $\text{Cs}_2\text{ZrF}_6$  (trigonal, ICSD Coll. Code 25598) reference. (b) TEM image of hollow  $\text{Cs}_2\text{ZrF}_6$  nanocrystals after 1-min reaction time.

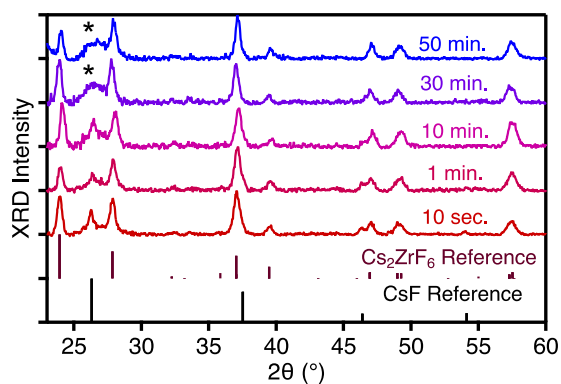

**Fig. S5.** pXRD data of low-temperature synthesis  $\text{Cs}_2\text{ZrF}_6$  nanocrystals ( $T_{\text{rxn}} = 180\text{ }^\circ\text{C}$ ) showing diminishing CsF impurity with increased reaction time, with reaction times indicated on the data. pXRD data are compared to  $\text{Cs}_2\text{ZrF}_6$  (trigonal, ICSD Coll. Code 25598) and CsF (cubic, ICSD Coll. Code 61563) references. Asterisk (\*) indicates diffuse Kapton tape peak. Kapton tape is used to cover the sample to avoid water adsorption from air.

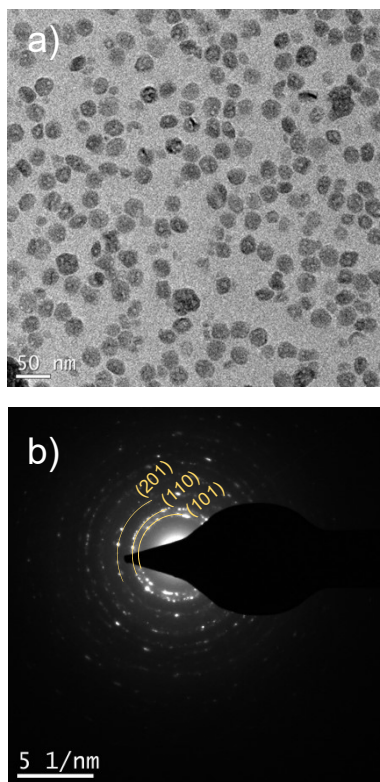

**Fig. S6.** (a) TEM image of  $\text{Cs}_2\text{ZrF}_6$  nanocrystals ( $T_{\text{rxn}} = 180^\circ\text{C}$ ) after additional washing procedure to separate CsF from colloid solution. (b) Electron diffractogram of sample showing a pure diffraction pattern of  $\text{Cs}_2\text{ZrF}_6$  without CsF impurity. Diffraction rings matched to  $\text{Cs}_2\text{ZrF}_6$  (trigonal, ICSD Coll. Code 25598) reference.

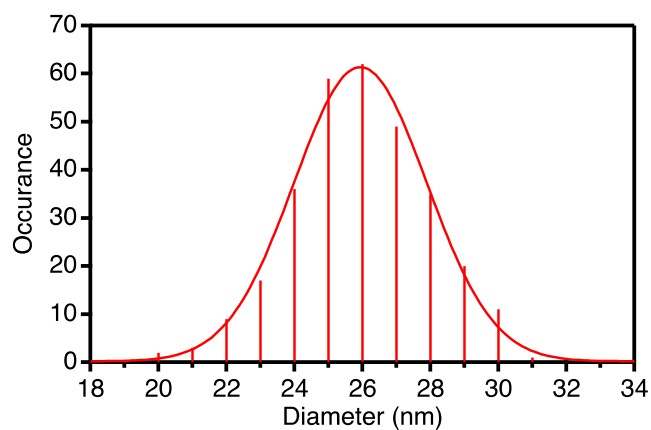

**Fig. S7.** Histogram containing measured diameters of 300  $\text{Cs}_2\text{ZrF}_6$  nanocrystals ( $T_{\text{rxn}} = 180^\circ\text{C}$ , 1-min reaction time) and fit to a Gaussian distribution with an average and standard deviation of  $26.5 \pm 2.0$  nm.

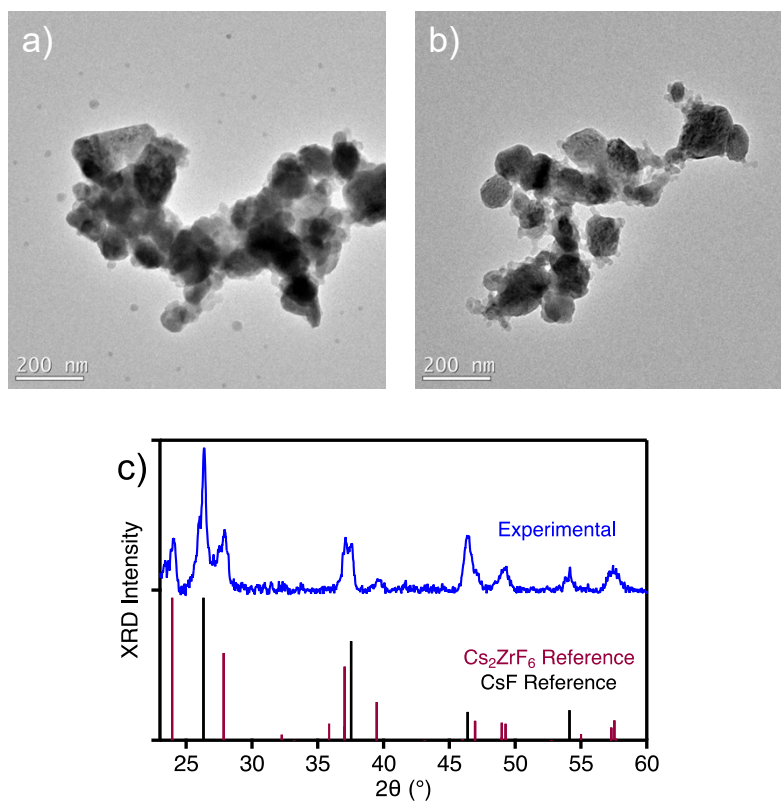

**Fig. S8.** In a follow-up low temperature synthesis ( $T_{\text{rxn}} = 180\text{ }^{\circ}\text{C}$ ), an aliquot was taken 30 sec after hot-injection, as the solution temperature was returning to  $180\text{ }^{\circ}\text{C}$ . (a,b) TEM images indicate that among the smaller  $\text{Cs}_2\text{ZrF}_6$  nanocrystals, large particle clusters  $>100\text{ nm}$  in size are also observed. (c) Scherrer analysis of the pXRD CsF linewidths indicates that the grain size of CsF is  $>\sim 50\text{ nm}$  at time of reaction collection whereas pXRD  $\text{Cs}_2\text{ZrF}_6$  linewidths yield an estimated average grain size of  $<20\text{ nm}$ , implying that the larger particles are likely CsF precipitate. pXRD data is compared to  $\text{Cs}_2\text{ZrF}_6$  (trigonal, ICSD Coll. Code 25598) and CsF (cubic, ICSD Coll. Code 61563) references.

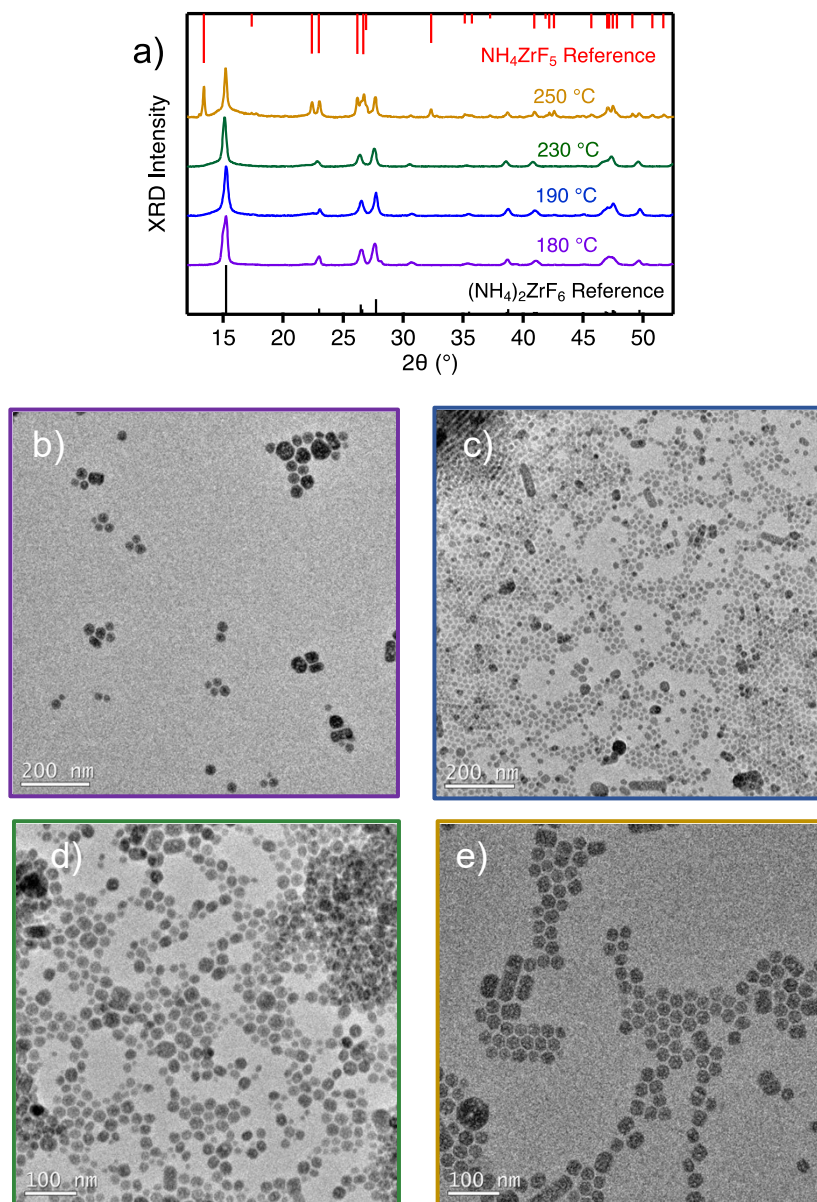

**Fig. S9.** (a) pXRD data of  $(\text{NH}_4)_2\text{ZrF}_6$  nanocrystals prepared at reaction temperatures between 180 °C and 250 °C, collected immediately after reaching temperature. The formation of  $\text{NH}_4\text{ZrF}_5$  is observed at  $T_{\text{rxn}} = 250$  °C. pXRD data are compared to  $(\text{NH}_4)_2\text{ZrF}_6$  (orthorhombic, PDF ID 04-014-8036) and  $\text{NH}_4\text{ZrF}_5$  (orthorhombic, PDF ID 00-020-1460) references. (b) TEM image of  $(\text{NH}_4)_2\text{ZrF}_6$  nanocrystals prepared at  $T_{\text{rxn}} = 180$  °C. (c) TEM image of  $(\text{NH}_4)_2\text{ZrF}_6$  nanocrystals prepared at  $T_{\text{rxn}} = 190$  °C. (d) TEM image of  $(\text{NH}_4)_2\text{ZrF}_6$  nanocrystals prepared at  $T_{\text{rxn}} = 230$  °C. (e) TEM image of  $(\text{NH}_4)_2\text{ZrF}_6$  nanocrystals prepared at  $T_{\text{rxn}} = 250$  °C.

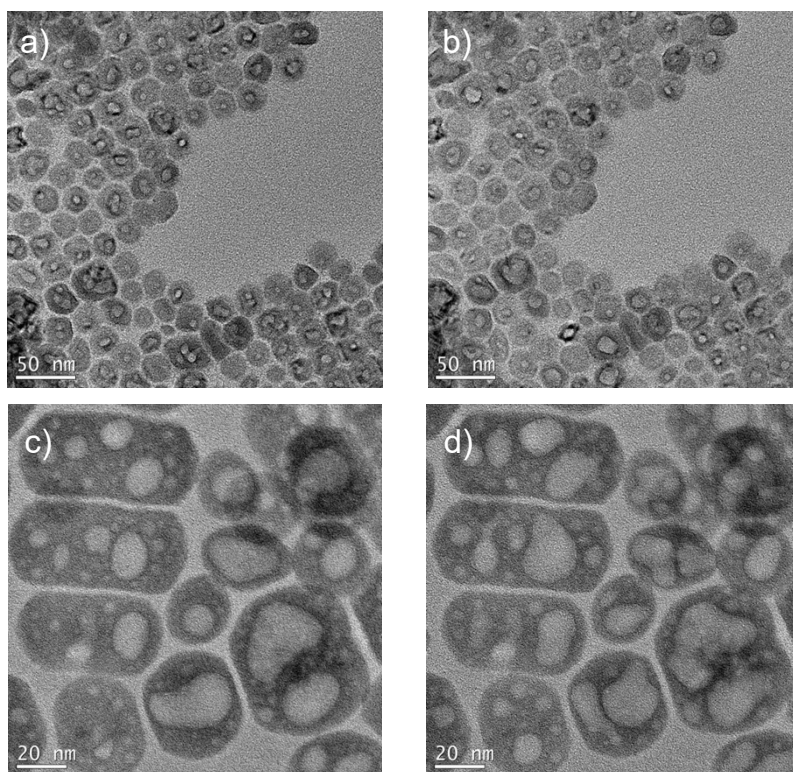

**Fig. S10.** To study the appearance of electron-beam sample damage when imaging on the transmission electron microscope, a region of  $\text{Cs}_2\text{ZrF}_6$  nanocrystals ( $T_{\text{rxn}} = 180^\circ\text{C}$ ) was placed under the electron beam for an extended period. (a) TEM image of a  $\text{Cs}_2\text{ZrF}_6$  nanocrystal sample shortly after being placed under the electron beam, (b) after 1 min under the beam. A region of  $(\text{NH}_4)_2\text{ZrF}_6$  nanocrystals ( $T_{\text{rxn}} = 180^\circ\text{C}$ ) was also placed under the electron beam for an extended period. (c) TEM image of a  $(\text{NH}_4)_2\text{ZrF}_6$  nanocrystal sample shortly after being placed under the electron beam, (d) after 1 min under the beam. Dispersed holing that increases with beam exposure is observed in both nanocrystals, but this phenomenon is explicitly different from the hollowing observed in  $\text{Cs}_2\text{ZrF}_6$  nanocrystals prepared at reaction temperatures above  $200^\circ\text{C}$ .

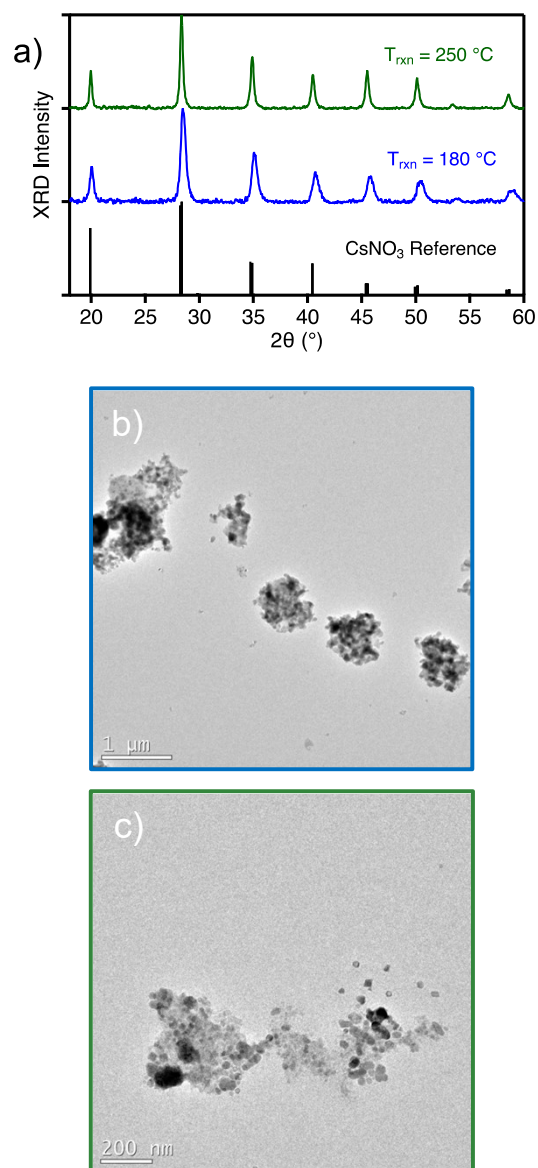

**Fig. S11.** Experiments at  $T_{\text{rxn}} = 180$  °C and  $250$  °C in which all parameters were kept the same as previously described *en route* to  $\text{Cs}_2\text{ZrF}_6$  nanocrystals, except that  $\text{Zr}(\text{C}_5\text{O}_2\text{H}_7)_4$  was omitted. (a) pXRD data of reaction products at  $T_{\text{rxn}} = 180$  °C (blue trace, 1-min reaction time) and  $T_{\text{rxn}} = 250$  °C (green trace, 10-min reaction time). pXRD data are compared to  $\text{CsNO}_3$  (trigonal, ICSD Coll. Code 64600) reference. (b) TEM image of  $T_{\text{rxn}} = 180$  °C product after 1-min reaction time, showing agglomerated  $\text{CsNO}_3$  nanocrystals. (c) TEM images of  $T_{\text{rxn}} = 250$  °C product after 10-min reaction time, showing agglomerated  $\text{CsNO}_3$  nanocrystals.

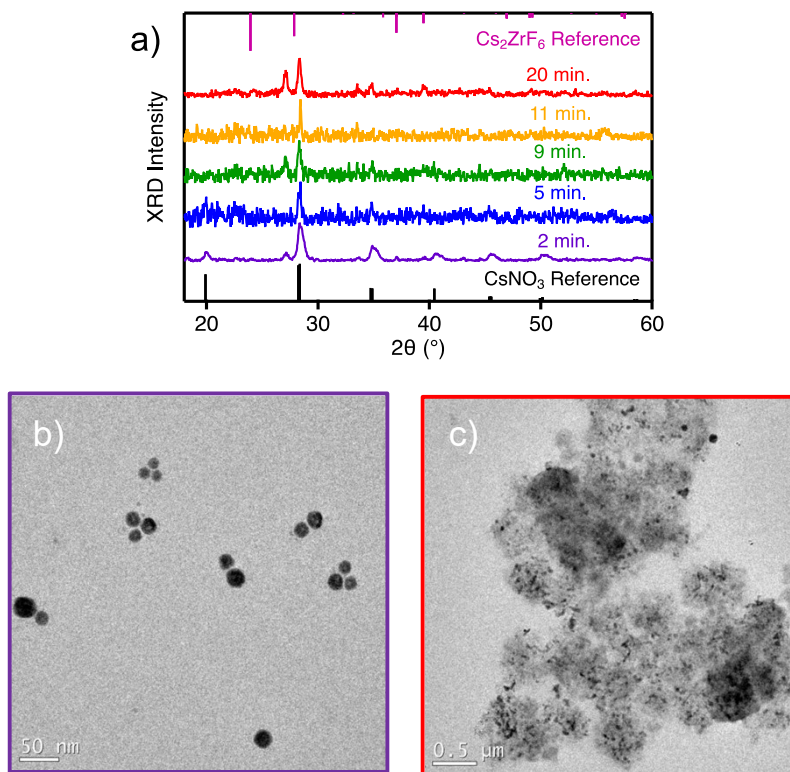

**Fig. S12.** To assess if the  $\text{CsNO}_3$  product observed when  $\text{Zr}(\text{C}_5\text{O}_2\text{H}_7)_4$  is omitted from the reaction is a critical precursor *en route* to  $\text{Cs}_2\text{ZrF}_6$  NC formation, Zr-oleate was injected into a solution of  $\text{CsNO}_3$  at 250 °C. (a) pXRD data of the reaction products collected at various time points after Zr-oleate injection. At early time points, the only crystalline material observed is  $\text{CsNO}_3$ . Conversion to  $\text{Cs}_2\text{ZrF}_6$  is also not observed at longer reaction times. pXRD data are compared to  $\text{CsNO}_3$  (trigonal, ICSD Coll. Code 64600) and  $\text{Cs}_2\text{ZrF}_6$  (trigonal, ICSD Coll. Code 25598) references. (b) TEM image of product after 2-min reaction time, showing  $\text{CsNO}_3$  nanocrystals. (c) TEM image after 20-min reaction time, showing large agglomerations of nanocrystals.

## HIGH-ANGLE ANNULAR DARK FIELD SCANNING TRANSMISSION ELECTRON MICROSCOPY

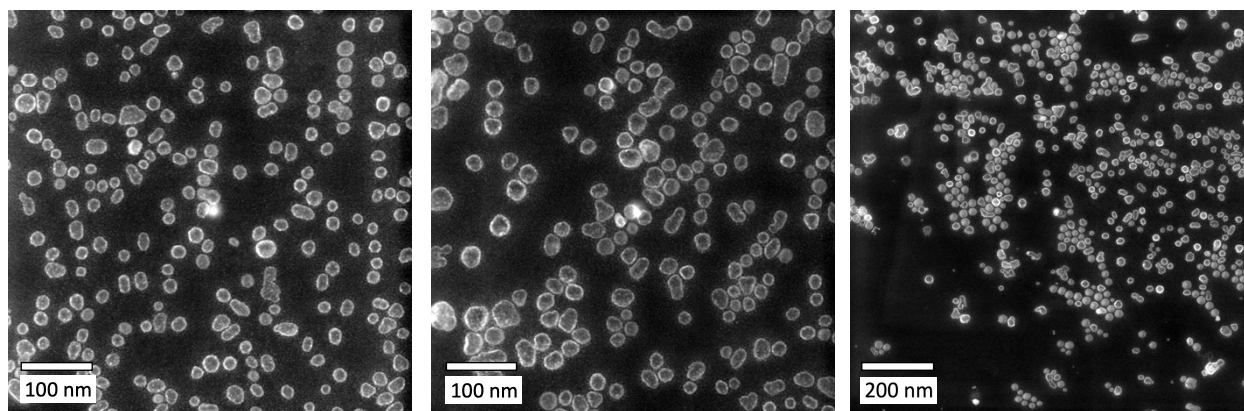

**Fig. S13.** High-angle annular dark-field scanning transmission electron microscope (HAADF-STEM) images confirm that Cs<sub>2</sub>ZrF<sub>6</sub> nanocrystals prepared at  $T_{\text{rxn}} = 250\text{ }^{\circ}\text{C}$  are predominantly hollow nanocrystals.

## SCANNING ELECTRON MICROSCOPY WITH ENERGY DISPERSIVE X-RAY SPECTROSCOPY

For better imaging, an ethanol wash of the  $\text{Cs}_2\text{ZrF}_6$  nanocrystals was preformed prior to imaging to strip ligands off the nanocrystal surfaces. This procedure resulted in the particle agglomeration observed in the images.

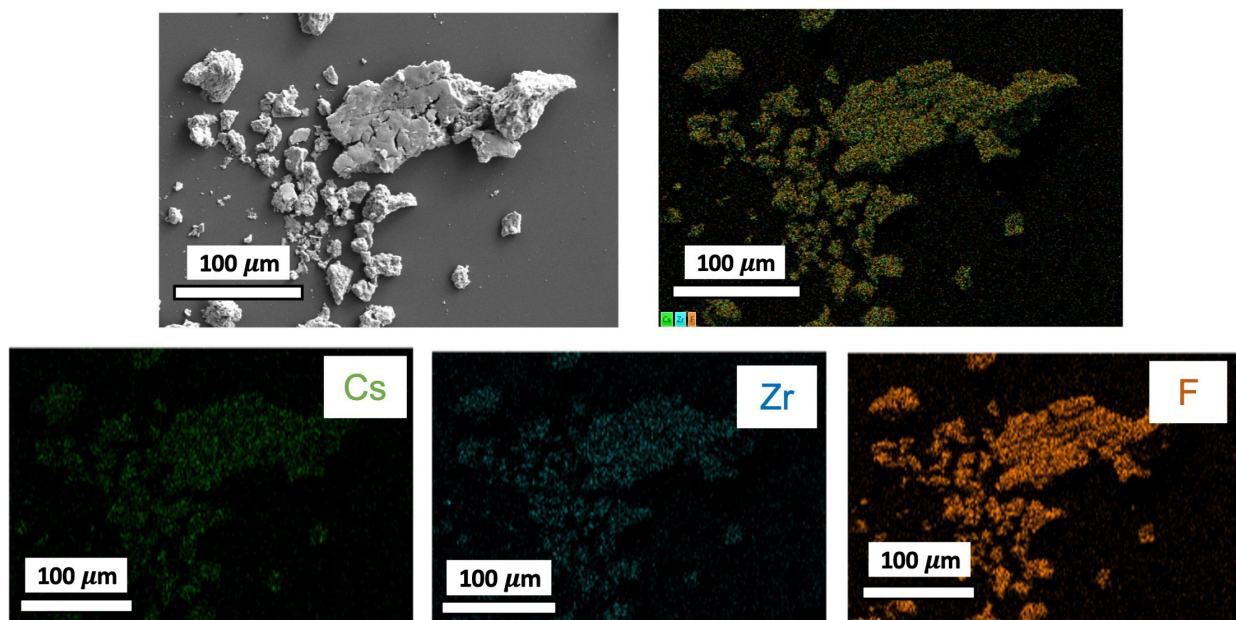

**Fig. S14.** Scanning electron microscopy-energy dispersive x-ray spectroscopy (SEM-EDX) elemental mapping of  $\text{Cs}_2\text{ZrF}_6$  crystals prepared at  $T_{\text{rxn}} = 180\text{ }^\circ\text{C}$ .

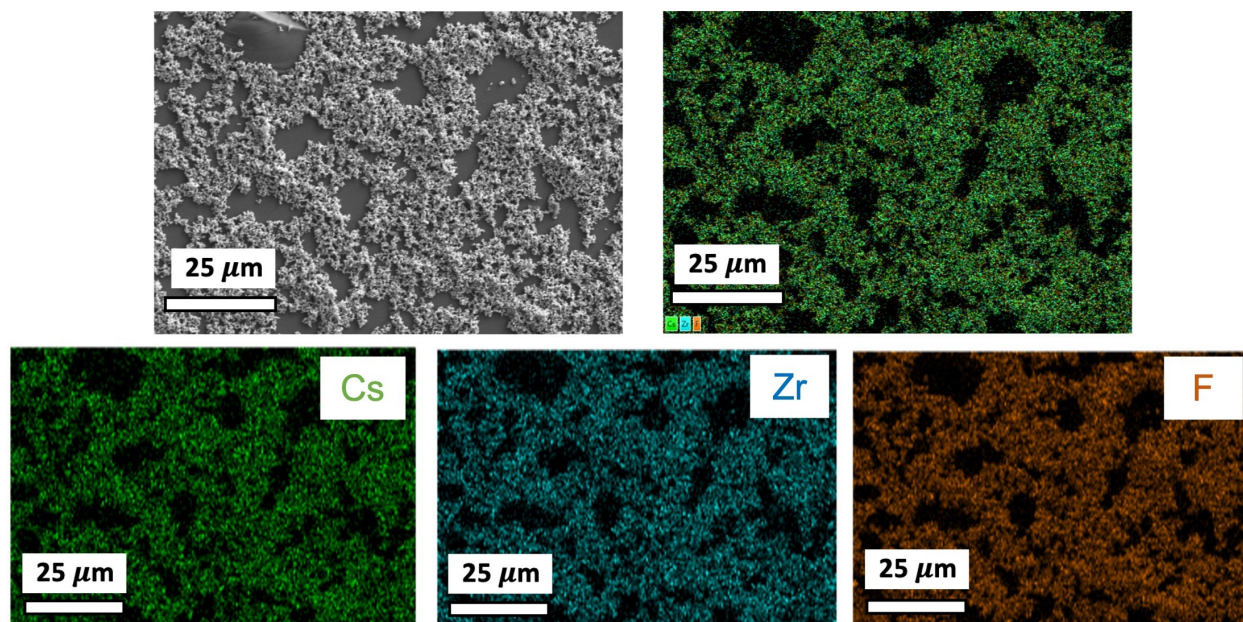

**Fig. S15.** SEM-EDX elemental mapping of  $\text{Cs}_2\text{ZrF}_6$  nanocrystals prepared at  $T_{\text{rxn}} = 250\text{ }^\circ\text{C}$ .

**Table S1.** Atomic ratios of elements from EDX elemental analysis on  $\text{Cs}_2\text{ZrF}_6$  nanocrystal samples prepared at different reaction temperatures.

| Sample                                                        | Cs  | Zr  | F   |
|---------------------------------------------------------------|-----|-----|-----|
| Hexagonal NCs at $T_{\text{rxn}} = 180\text{ }^\circ\text{C}$ | 2.3 | 1.0 | 5.9 |
| Hollow NCs at $T_{\text{rxn}} = 250\text{ }^\circ\text{C}$    | 2.2 | 1.0 | 5.2 |

## References

1. J. C. Boyer, L. A. Cuccia, J. A. Capobianco, *Nano Lett.*, 2007, **7**, 847.
2. C. Rüssel, *J. Non-Cryst. Solids*, 1993, **152**, 161.
